# Supplementary material
Source: PubMed Central journal article supplement (PMC5910003)

SUPPLEMENTARY DATA

**Elevated Medium Chain-Acylcarnitines are Associated with Gestational Diabetes and Early Progression to Type-2 Diabetes and Induce Pancreatic  $\beta$ -Cell Dysfunction**

**Short title:** Elevated M-acylCs Impair  $\beta$ -Cell Function

Battsetseg Batchuluun<sup>1</sup>, Dana Al Rijjal<sup>1</sup>, Kacey J.Prentice<sup>1</sup>, Judith A.Eversley<sup>1</sup>, Elena Burdett<sup>1</sup>, Haneesha Mohan<sup>1</sup>, Alpana Bhattacharjee<sup>1</sup>, Erica P.Gunderson<sup>2</sup>, \*Ying Liu<sup>1</sup>, \*Michael B.Wheeler<sup>1</sup>

<sup>1</sup>Department of Physiology, University of Toronto, Toronto ON, Canada

<sup>2</sup>Kaiser Permanente Northern California, Division of Research, Oakland CA, USA

\*Corresponding authors: Dr. Michael Wheeler (michael.wheeler@utoronto.ca), Dr. Ying Liu (yingmsb.liu@utoronto.ca), Department of Physiology, 1 King's College Circle, Medical Science Building Rm#3352, Toronto, Ontario, M5S 1A8, Canada Tel: 416-978-6737 Fax: 416-978-4940

**Supplementary Table 1.** Characteristics of SWIFT cohort women with recent GDM who developed IGT, T2D or returned to normoglycemia during 2-year follow up.

| Characteristics          | NGT<br>(n=11) | IGT<br>(n=13) | T2D<br>(n=12) | p-Value |
|--------------------------|---------------|---------------|---------------|---------|
| Age (years)              | 35.45±1.37    | 34.92±1.77    | 35.66±1.6     | 0.94    |
| BMI (kg/m <sup>2</sup> ) | 33.6±1.24     | 35.65±1.25    | 37.17±1.65    | 0.22    |
| FPG (mg/dl)              | 91.18±1.81    | 107.79±2.88   | 124.75±6.06   | <0.001  |
| 2hPG, mg/dl              | 97.9±7.15     | 155.3±6.68    | 205.91±14.86  | <0.001  |
| Insulin (mU/ml)          | 30.12±6.68    | 44.21±5.92    | 51.77±6.47    | 0.07    |
| Triglycerides (mg/dl)    | 89.9±9.85     | 165.69±28.98  | 154.25±29.34  | 0.09    |
| HDL-C (mg/dl)            | 50.18±3.24    | 44.23±3.2     | 41.5±2.33     | 0.13    |
| HOMA-IR                  | 6.96±1.65     | 11.93±1.68    | 16.41±2.31    | 0.006   |
| HOMA-B                   | 357.87±64.33  | 359.56±48.56  | 322.75±59.28  | 0.95    |

**Supplementary Table 2.** Primers used for qPCR

| Gene name       | Forward (5'-3')      | Reverse (5'-3')       |
|-----------------|----------------------|-----------------------|
| <i>mGlut2</i>   | CCTTGGGCCTTACGTGTTCT | TTGTACAGCAGCTTTGCGTG  |
| <i>mGCK</i>     | ATGCTGGATGACAGAGCCAG | CCACGGTCCATCTCCTTCTG  |
| <i>mUcp1</i>    | CACGGGGACCTACAATGCTT | ACAGTAAATGGCAGGGGACG  |
| <i>mUcp2</i>    | AAGTGTTTCGTCTCCCAGCC | GGGACCTTCAATCGGCAAGA  |
| <i>mUcp3</i>    | GACCCACGGCCTTCTACAAA | TCAAAAACGGAGATTCCCGCA |
| <i>mB-actin</i> | ATGTGGATCAGCAAGCAGGA | AGCTCAGTAACAGTCCGCCTA |

SUPPLEMENTARY DATA

**Supplementary Table 3.** Antibodies used for western blotting

| <b>Antibody</b>     | <b>Dilution</b> | <b>Supplier</b> | <b>Cat.Number</b> |
|---------------------|-----------------|-----------------|-------------------|
| Anti-GLUT2          | 1:1000          | Millipore       | 07-1402           |
| Anti-UCP3           | 1:1000          | Abcam           | ab180643          |
| Anti-Total Oxphos   | 1:250           | Mitosciences    | ab110413          |
| Anti- $\beta$ Actin | 1:1000          | Cell Signaling  | 4967S             |

SUPPLEMENTARY DATA

**Supplementary Figure 1.** (A) Relative abundance of short chain- and long chain-acylCs in GDM patients (n=12/group); Circulating (B) short chain- and (C) long chain-acylCs in IGT and T2D patients (n=11 for NGT, 13 for IGT and 12 for T2D) (n=11 for NGT, 13 for IGT and 12 for T2D)

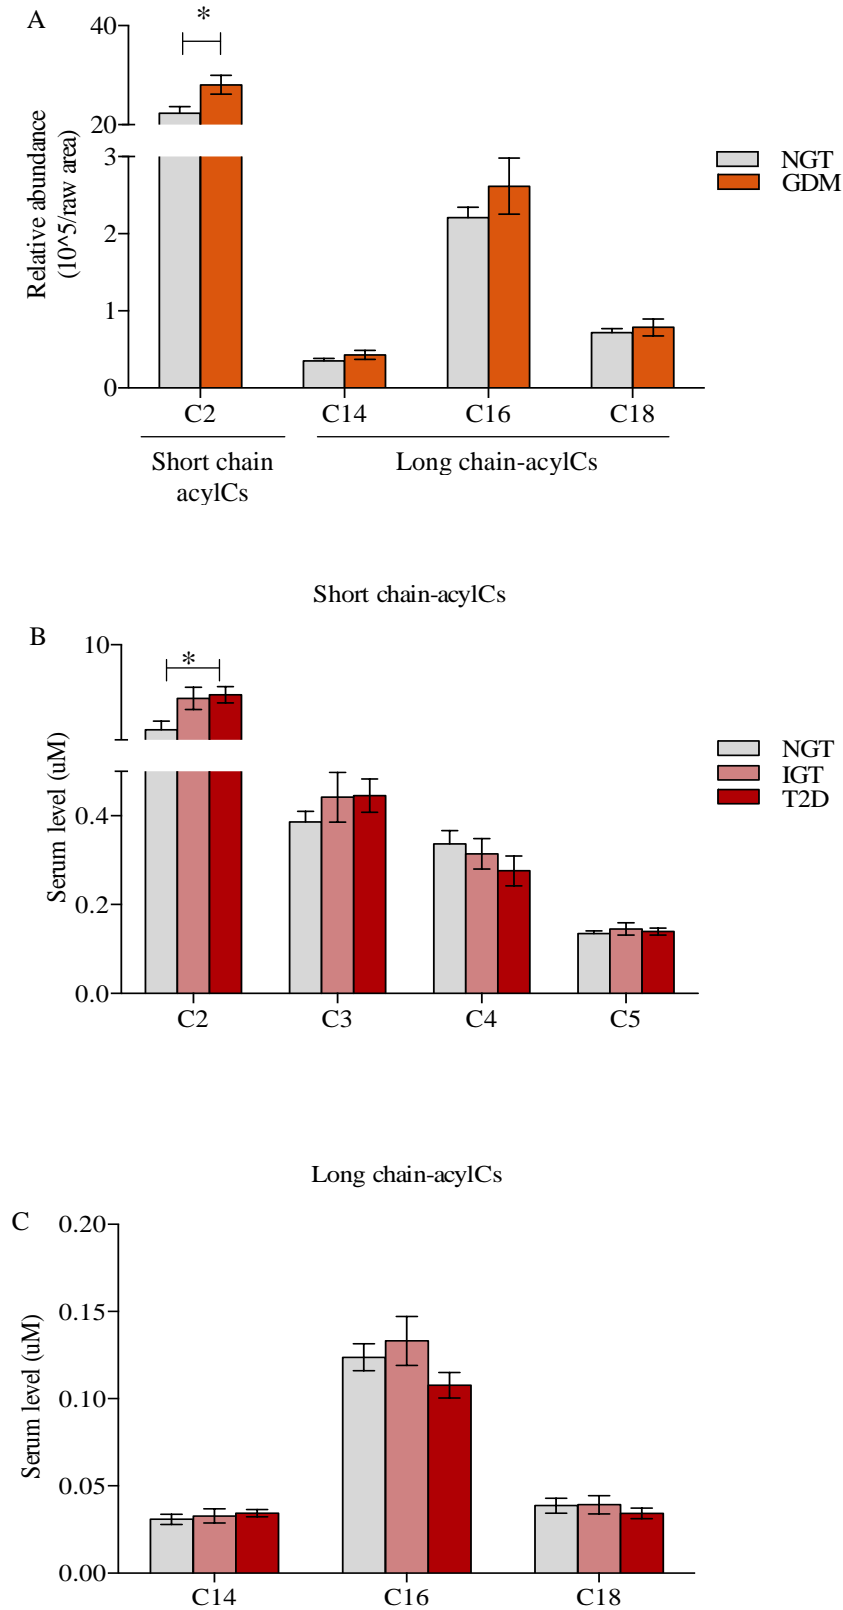

SUPPLEMENTARY DATA

**Supplementary Figure 2.** (A) Glut2 relative gene expression in murine islets isolated from mice injected with and without M-acylCs for 2 weeks (n=4/group); (B) western blot of GLUT2 expression and its quantification in islets isolated from mice injected with M-acylCs (n=4/group). (C) percentage of glucose responsive cells during calcium flux analysis in murine islets treated with and without M-acylCs in vitro (n=68, 84 individual cells). (D) ROS level were evaluated in murine islets treated in vitro (n=6/group). Data are presented as mean±SEM; \*p<0.05, \*\*p<0.01.

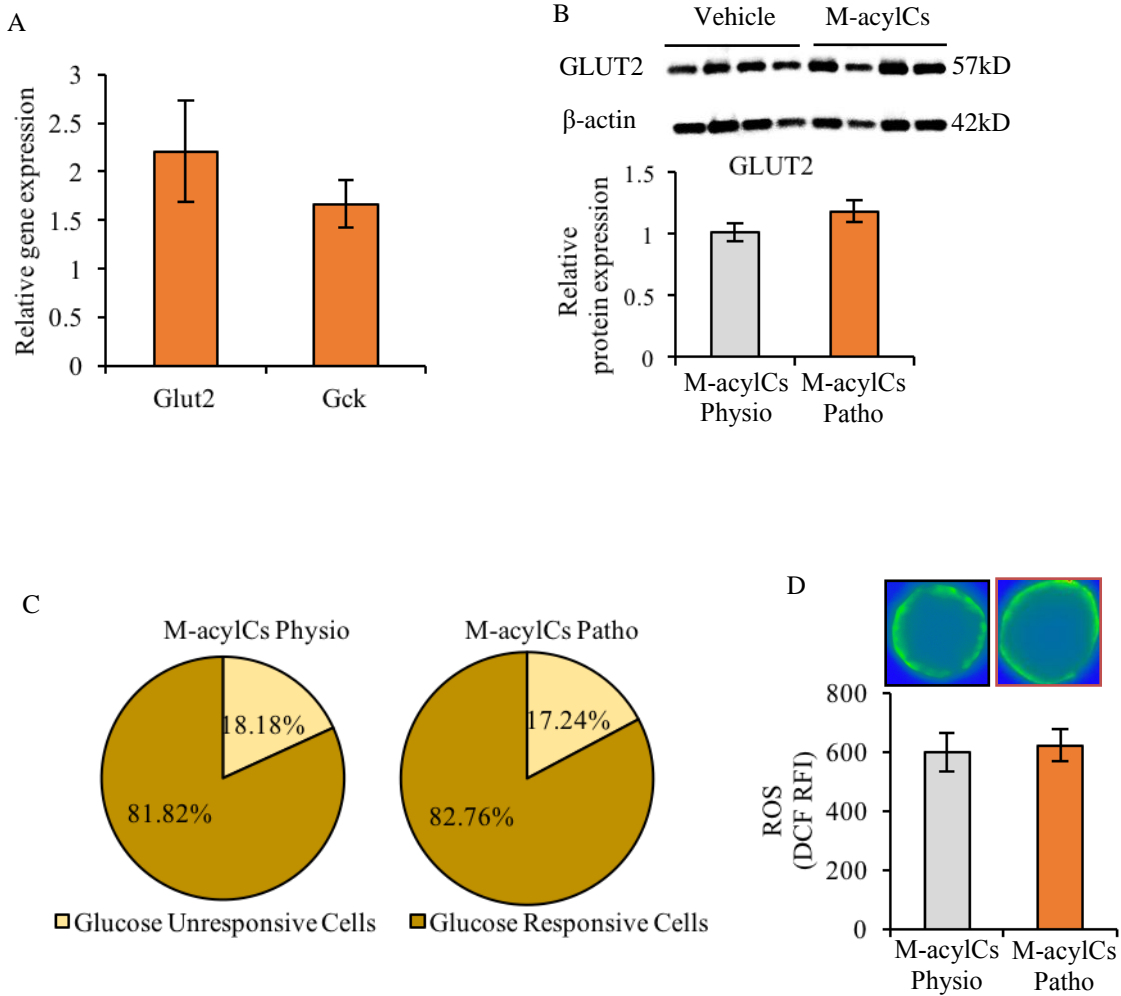

SUPPLEMENTARY DATA

**Supplementary Figure 3.** Mitochondrial gene-array was performed in murine islets treated with and without acylCsin *in vitro* and relative gene expression of mitochondrial genes is shown by their functional group (n=3/group). Data are presented as mean±SEM; \*\*p<0.01.

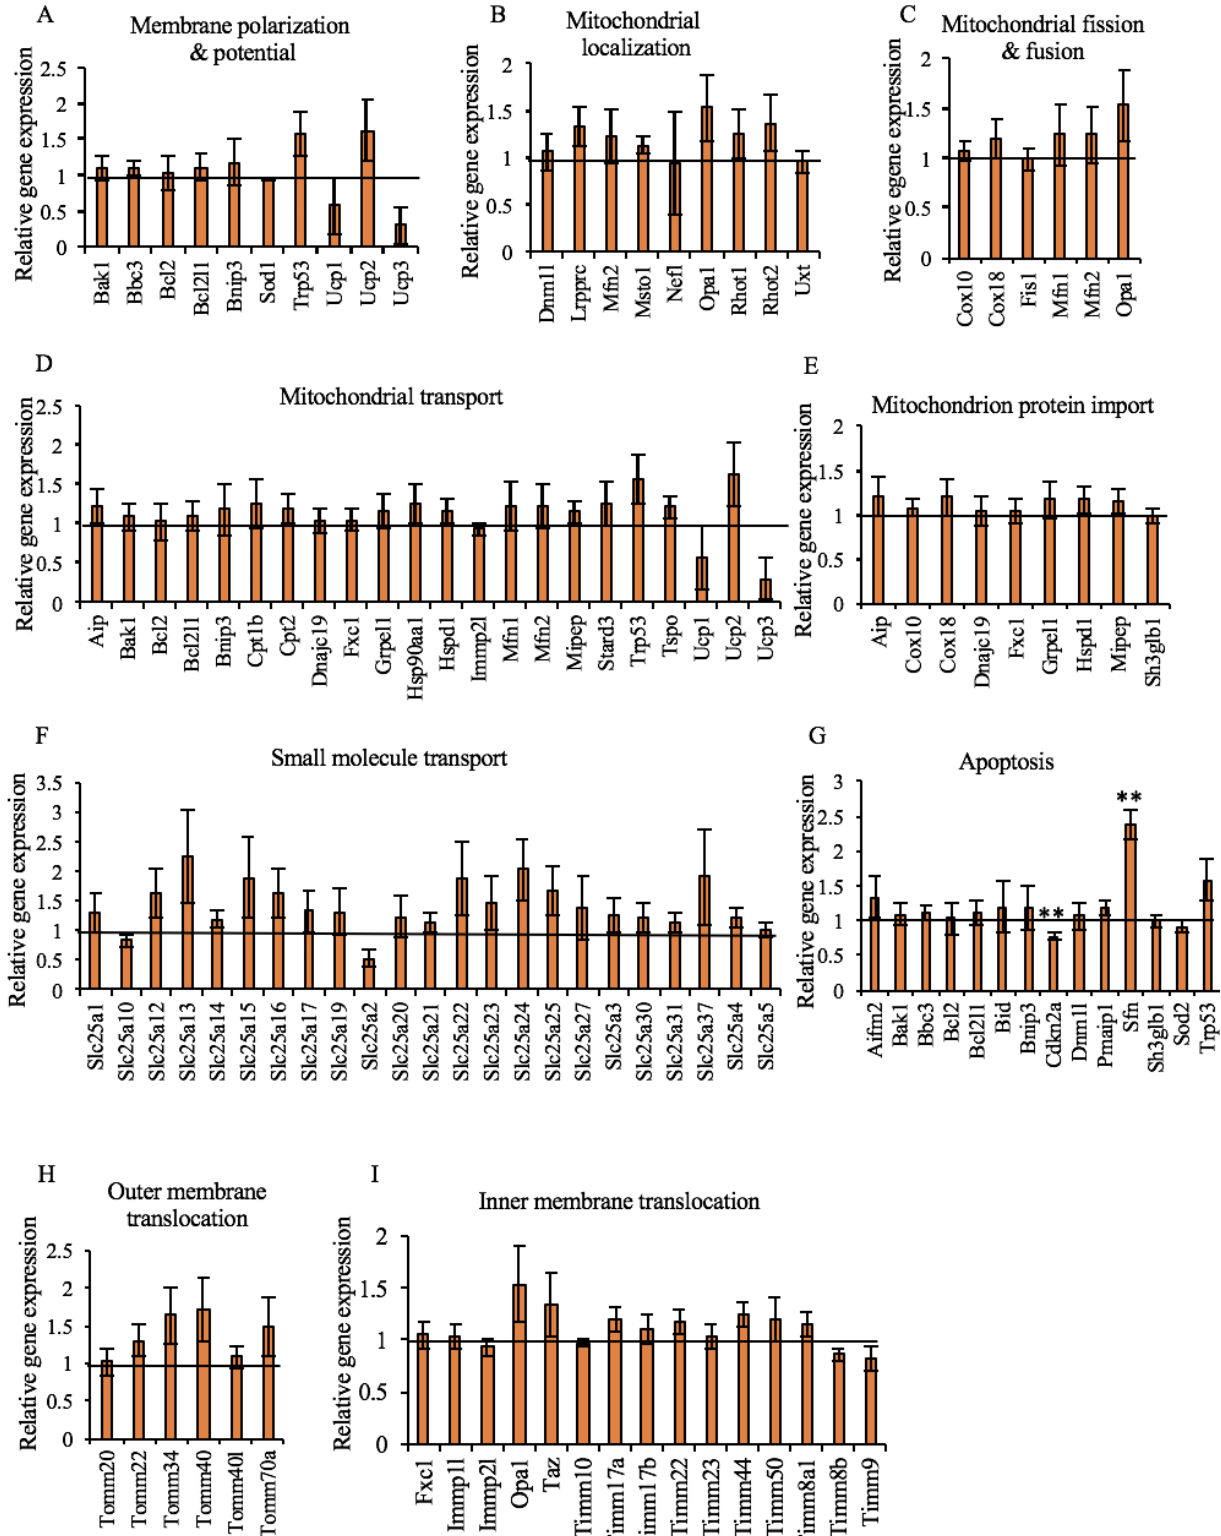

SUPPLEMENTARY DATA

**Supplementary Figure 4.** (A) Gene expression of uncoupling proteins, (B) a representative western blot of UCP3 expression and its quantification (n=3/group); (C) A representative western blot of stratifin (SFN) expression and its quantification. Data are presented as mean±SEM; \*p<0.05, \*\*\*p<0.001 vs M-acylCs Physio group

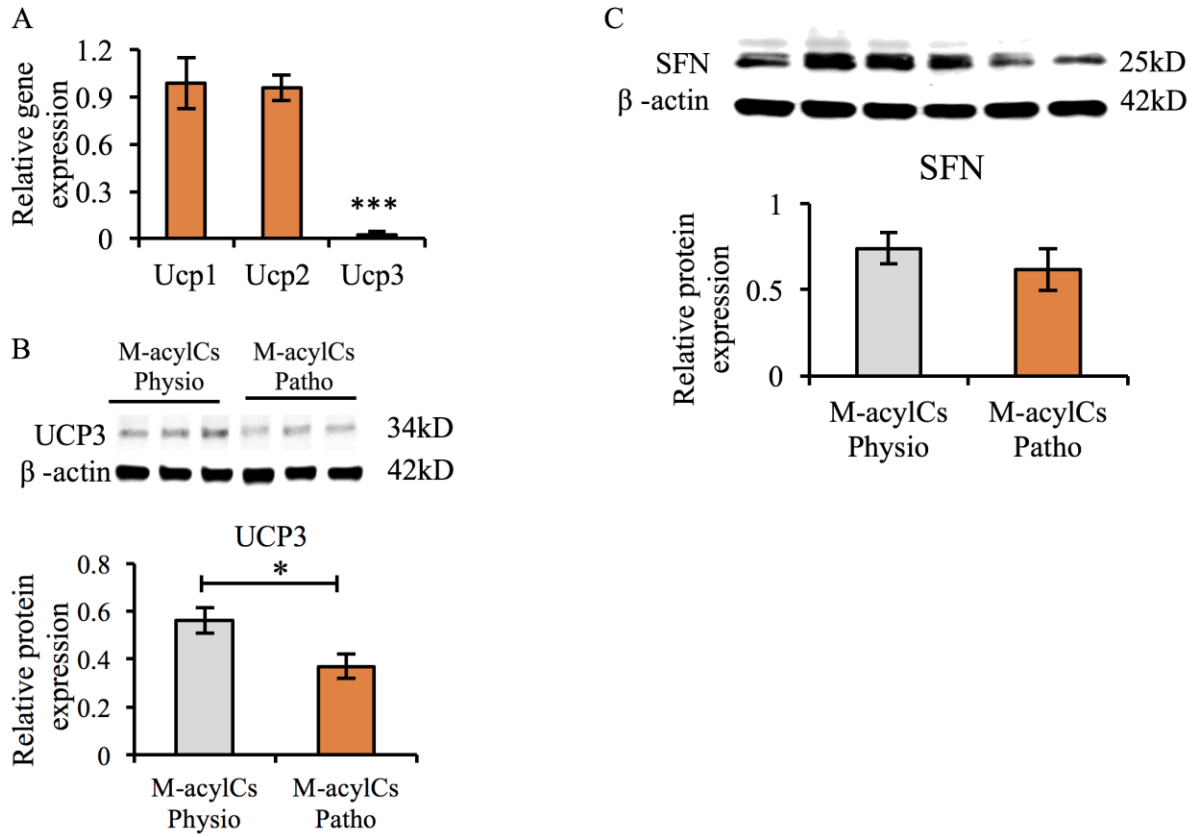

Supplement: DB171150SupplementaryData.pdf [file DB171150SupplementaryData.pdf]
